# Supplementary material
Source: PubMed Central journal article supplement (PMC9216043)
Supplement: kfac023_supplementary_data.pdf [file kfac023_supplementary_data.pdf]

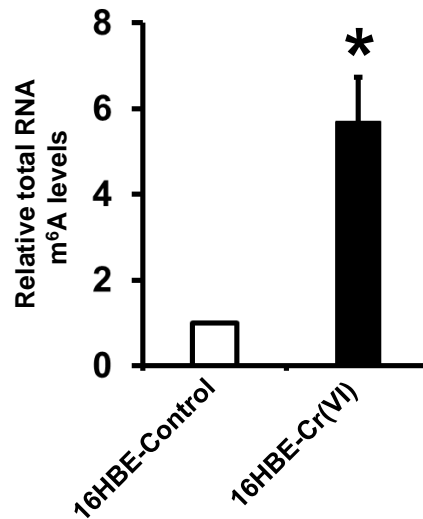

**Supplementary Figure 1.** Total RNA m<sup>6</sup>A modification levels are significantly increased in chronic Cr(VI) exposure-transformed human bronchial epithelial 16HBE cells. The immortalized 16HBE cells were continuously exposed to 0.25  $\mu$ M of Cr(VI) ( $K_2Cr_2O_7$ ) for 40 weeks for cell transformation as described in Materials and Methods. At the end of cell transformation, passage-matched control cells (16HBE-Control) and Cr(VI)-exposed cells [16HBE-Cr(VI)] were collected for total RNA m<sup>6</sup>A level analysis by using the EpiQuik m<sup>6</sup>A RNA Methylation Quantification Kit. The total RNA m<sup>6</sup>A levels are expressed relative to the passage-matched control cells (means  $\pm$  SD, n=3) \*  $p < 0.05$ .

A

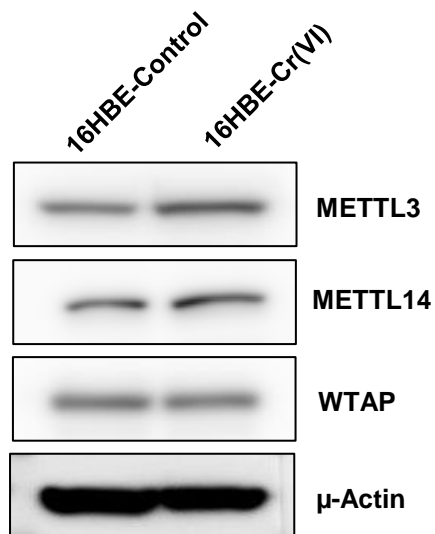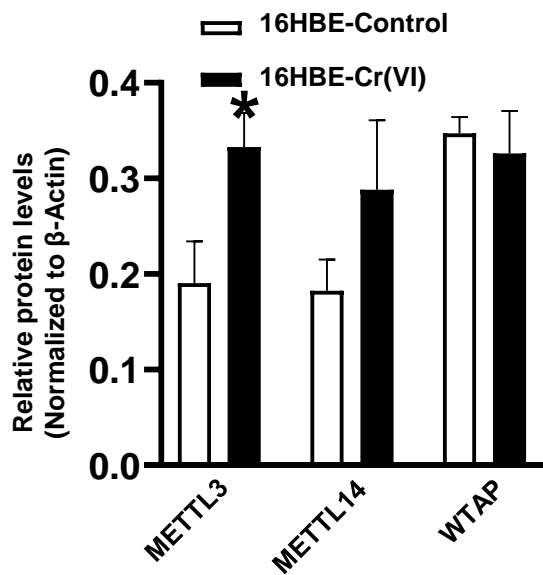

B

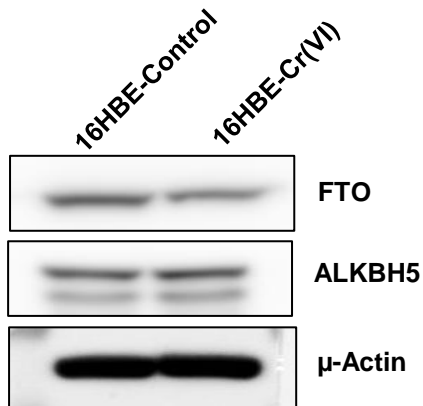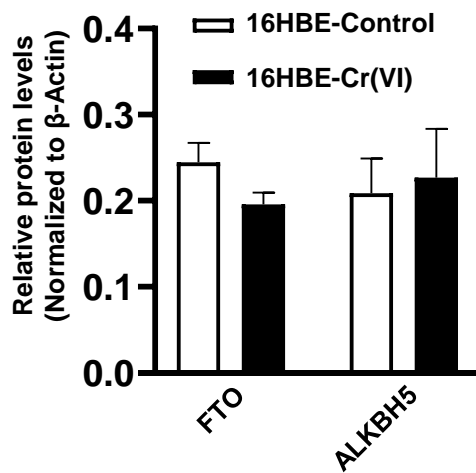

C

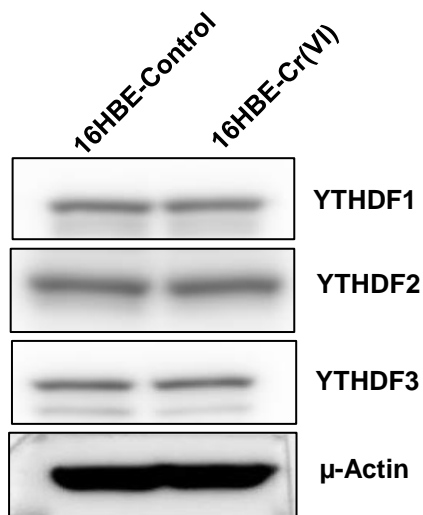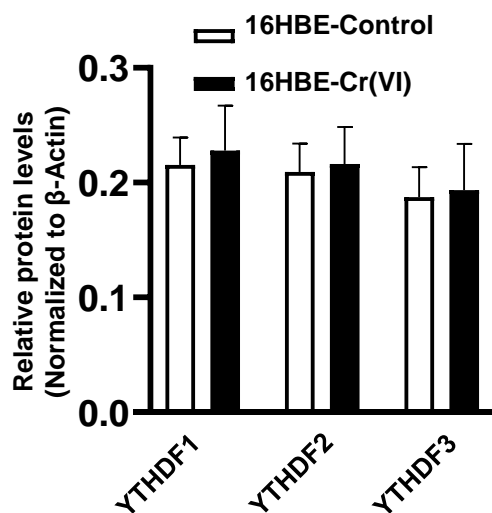

**Supplementary Figure 2.** The RNA methyltransferase METTL3 expression levels are significantly up-regulated in chronic Cr(VI) exposure-transformed human bronchial epithelial 16HBE cells. (A-C) Representative Western blot analysis images for the selected m<sup>6</sup>A writers (A), erasers (B) and reader(C) proteins in passage-matched control cells and Cr(VI)-transformed 16HBE cells. The corresponding bar charts present the quantitative results of Western blot analysis of m<sup>6</sup>A writers, erasers and reader proteins in passage-matched control cells and Cr(VI)-transformed cells. The corresponding Western blot protein band intensities were quantified using the ImageJ software and normalized by the intensity of the  $\beta$ -actin protein band (means  $\pm$  SD, n=3). \*  $p < 0.05$ .

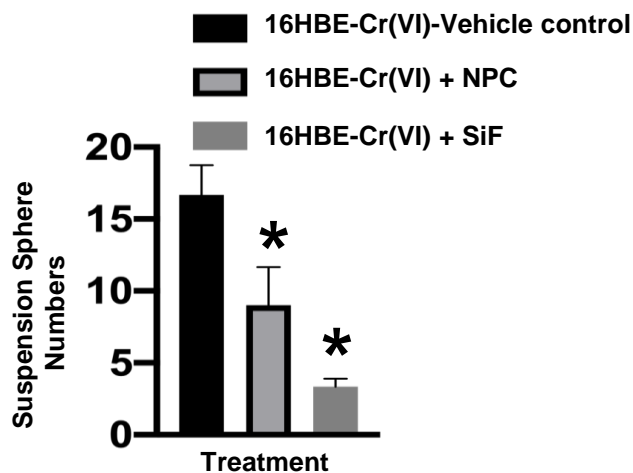

**Supplementary Figure 3.** Pharmacological inhibitions of the methyltransferase activities significantly reduces the number of suspension spheres formed by chronic Cr(VI) exposure-transformed 16HBE cells. Cells were treated once with a vehicle control, NPC (Neplanocin A, 200 nM), or SiF (Sinefungin, 25  $\mu$ M) when cells were seeded into the 24 well-plate. The suspension spheres were photographed and counted (if  $>100 \mu\text{m}$ ) 10 days after the cell seeding. The results are presented as means  $\pm$  SD (n=3). \*  $p < 0.05$ .

A

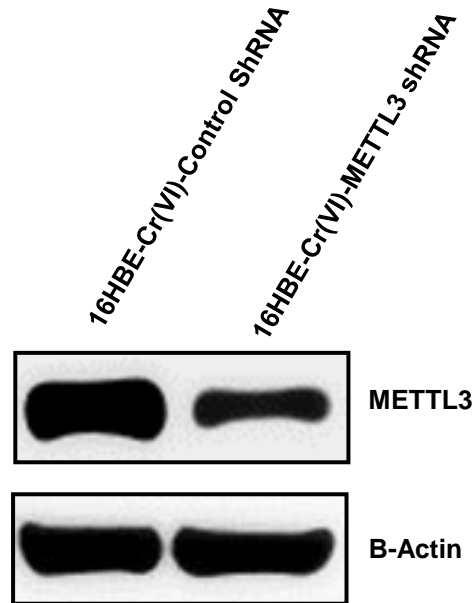

B

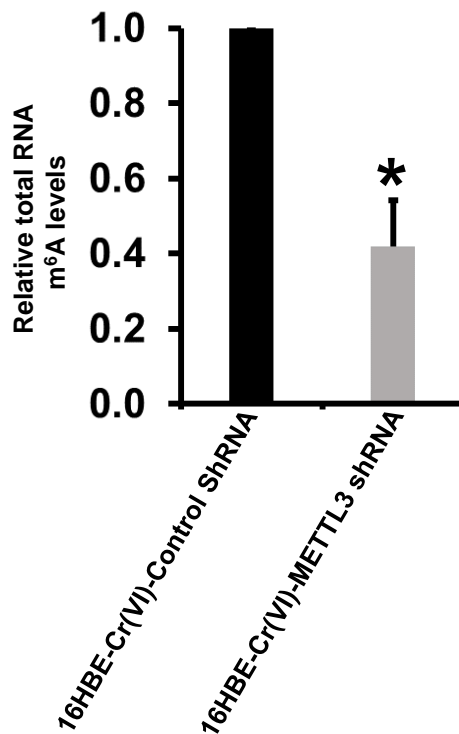

**Supplementary Figure 4.** Stable knockdown of METTL3 in Cr(VI)-transformed 16HBE cells significantly reduces their total RNA m<sup>6</sup>A modification levels. (A) Representative Western blot image showing the METTL3 knockdown efficiency in Cr(VI)-transformed 16HBE cells. (B) METTL3 knockdown significantly reduces total RNA m<sup>6</sup>A levels determined by using the EpiQuik m<sup>6</sup>A RNA Methylation Quantification Kit. The total RNA m<sup>6</sup>A levels are expressed relative to the control shRNA cells (means  $\pm$  SD, n=3). \*  $p < 0.05$ .

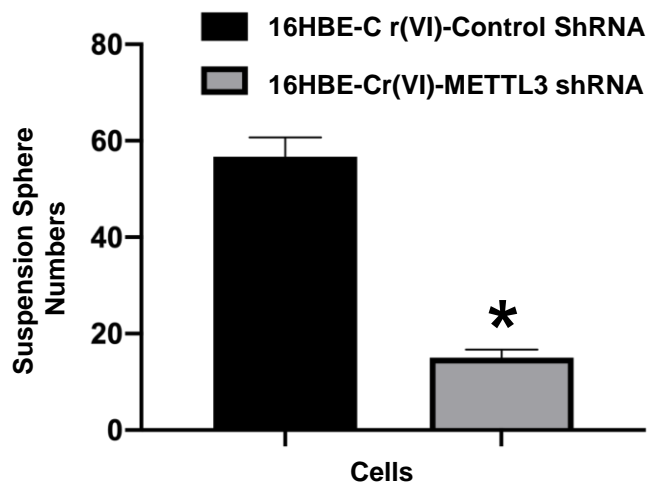

**Supplementary Figure 5.** Stable knockdown of METTL3 significantly reduces the numbers of suspension spheres formed by Cr(VI)-transformed 16HBE cells. The results are presented as means  $\pm$  SD (n=3). \*  $p < 0.05$ .

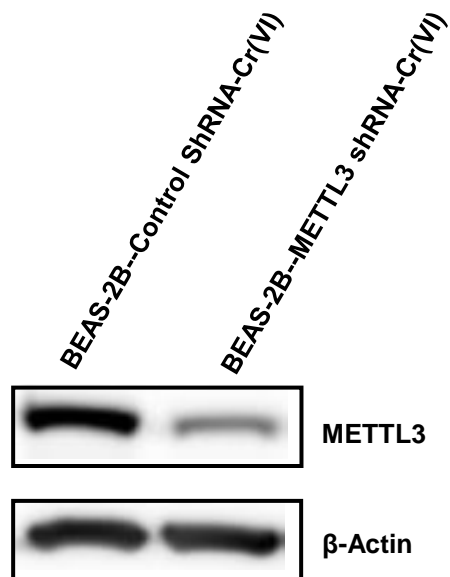

**Supplementary Figure 6.** METTL3 expression levels in chronic Cr(VI)-exposed BEAS-2B-Control shRNA [BEAS-2B\_Control shRNA-Cr(VI)] and BEAS-2B-METTL3 shRNA cells [BEAS-2B-METTL3 shRNA-Cr(VI)]. A representative Western blot analysis image for METTL3 expression levels in BEAS-2B-Control shRNA and BEAS-2B-METTL3 shRNA cells exposed to Cr(VI) for 20 weeks.
